# Supplementary material for: Examining the quality and population representativeness of linked survey and administrative data: guidance and illustration using linked 1958 National Child Development Study and Hospital Episode Statistics data
Source: PubMed Central journal article supplement — Int J Popul Data Sci. 2024 Jan 9;9(1):2137. doi: 10.23889/ijpds.v9i1.2137 (PMC10901060; doi:10.23889/ijpds.v9i1.2137), 2024-01-09

## Supplementary Material

Supplementary Table 1: Number (%) of 1958 National Child Development Study (NCDS) cohort members with linked Hospital Episode Statistics (HES) data by proportion of waves between 6 and 9 that they lived in England. Waves with missing data on residency are excluded from the proportion calculation<sup>A</sup>. Analysis restricted to cohort members providing consent for linkage

|                    | Proportion of waves between 6 and 9 living in England |          |           |          |           |              | Total        |
|--------------------|-------------------------------------------------------|----------|-----------|----------|-----------|--------------|--------------|
|                    | 1/4                                                   | 1/3      | 1/2       | 2/3      | 3/4       | 1            |              |
| No linked HES data | 13 (52.0)                                             | 4 (40.0) | 13 (36.1) | 3 (27.3) | 11 (18.0) | 430 (6.7)    | 474 (7.2)    |
| Linked HES data    | 12 (48.0)                                             | 6 (60.0) | 23 (63.9) | 8 (72.7) | 50 (82.0) | 6,020 (93.3) | 6,119 (92.8) |
| Total              | 25                                                    | 10       | 36        | 11       | 61        | 6,450        | 6,593        |

<sup>A</sup>So, for example, a proportion of "1/3" means 1 wave living in England, 2 waves not living in England and 1 wave with unknown residency and a proportion of "2/4" means either 2 waves living in England and 2 waves not living in England or 1 wave living in England, 1 wave not living in England and 2 waves with unknown residency.

Supplementary Table 2: Linked Hospital Episode Statistics (HES) Admitted Patient Care (APC) data between date of last interview/2000 and date of wave 8 (age 50) interview against self-reported day patient or in-patient attendance at wave 8 (age 50) in the National Child Development Study (NCDS): males

| Linked HES APC data between date of last interview/2000 and date of wave 8 (age 50) interview |       |                                  |                 |       |                                                  |                 |       |                        |                 |       |
|-----------------------------------------------------------------------------------------------|-------|----------------------------------|-----------------|-------|--------------------------------------------------|-----------------|-------|------------------------|-----------------|-------|
|                                                                                               |       | Individuals with linked APC data |                 |       | Individuals with at least one linked HES dataset |                 |       | All linkage consenters |                 |       |
|                                                                                               |       | No linked HES data               | Linked HES data | Total | No linked HES data                               | Linked HES data | Total | No linked HES data     | Linked HES data | Total |
| Age 50 day patient or in-patient attendance                                                   | No    | 1,189 (78.7)                     | 322 (21.3)      | 1,511 | 1,853 (85.2)                                     | 322 (14.8)      | 2,175 | 2,111 (86.8)           | 322 (13.2)      | 2,433 |
|                                                                                               | Yes   | 143 (18.7)                       | 623 (81.3)      | 766   | 192 (23.6)                                       | 623 (76.4)      | 815   | 214 (25.6)             | 623 (74.4)      | 837   |
|                                                                                               | Total | 1,332 (58.5)                     | 945 (41.5)      | 2,277 | 2,045 (68.4)                                     | 945 (31.6)      | 2,990 | 2,325 (71.1)           | 945 (28.9)      | 3,270 |

Supplementary Table 3: Linked Hospital Episode Statistics (HES) Admitted Patient Care (APC) data between date of last interview/2000 and date of wave 8 (age 50) interview against self-reported day patient or in-patient attendance at wave 8 (age 50) in the National Child Development Study (NCDS): females

| Linked HES APC data between date of last interview/2000 and date of wave 8 (age 50) interview |       |                                  |                 |       |                                                  |                 |       |                        |                 |       |
|-----------------------------------------------------------------------------------------------|-------|----------------------------------|-----------------|-------|--------------------------------------------------|-----------------|-------|------------------------|-----------------|-------|
|                                                                                               |       | Individuals with linked APC data |                 |       | Individuals with at least one linked HES dataset |                 |       | All linkage consenters |                 |       |
|                                                                                               |       | No linked HES data               | Linked HES data | Total | No linked HES data                               | Linked HES data | Total | No linked HES data     | Linked HES data | Total |
| Age 50 day patient or in-patient attendance                                                   | No    | 1,252 (78.9)                     | 335 (21.1)      | 1,587 | 1,762 (84.0)                                     | 335 (16.0)      | 2,097 | 1,939 (85.3)           | 335 (14.7)      | 2,274 |
|                                                                                               | Yes   | 166 (16.9)                       | 815 (83.1)      | 981   | 216 (21.0)                                       | 815 (79.0)      | 1,031 | 233 (22.2)             | 815 (77.8)      | 1,048 |
|                                                                                               | Total | 1,418 (55.2)                     | 1,150 (44.8)    | 2,568 | 1,978 (63.2)                                     | 1,150 (36.8)    | 3,128 | 2,172 (65.4)           | 1,150 (34.6)    | 3,322 |

Supplementary Table 4: Linked Hospital Episode Statistics (HES) Admitted Patient Care (APC) data for the 5 years prior to the date of the wave 9 (age 55) interview against self-rated general health at age 55 in the National Child Development Study (NCDS): males

|                                  |           | Linked HES APC data for the 5 years prior to the date of the wave 9 (age 55) interview |                 |       |                                                  |                 |       |                        |                 |       |
|----------------------------------|-----------|----------------------------------------------------------------------------------------|-----------------|-------|--------------------------------------------------|-----------------|-------|------------------------|-----------------|-------|
|                                  |           | Individuals with linked APC data                                                       |                 |       | Individuals with at least one linked HES dataset |                 |       | All linkage consenters |                 |       |
|                                  |           | No linked HES data                                                                     | Linked HES data | Total | No linked HES data                               | Linked HES data | Total | No linked HES data     | Linked HES data | Total |
| Age 55 self-rated general health | Excellent | 124 (57.9)                                                                             | 90 (42.1)       | 214   | 237 (72.5)                                       | 90 (27.5)       | 327   | 293 (76.5)             | 90 (23.5)       | 383   |
|                                  | Very good | 346 (56.1)                                                                             | 271 (43.9)      | 617   | 602 (69.0)                                       | 271 (31.0)      | 873   | 706 (72.3)             | 271 (27.7)      | 977   |
|                                  | Good      | 297 (45.3)                                                                             | 359 (54.7)      | 656   | 490 (57.7)                                       | 359 (42.3)      | 849   | 549 (60.5)             | 359 (39.5)      | 908   |
|                                  | Fair      | 127 (38.7)                                                                             | 201 (61.3)      | 328   | 180 (47.2)                                       | 201 (52.8)      | 381   | 196 (49.4)             | 201 (50.6)      | 397   |
|                                  | Poor      | 32 (23.4)                                                                              | 105 (76.6)      | 137   | 44 (29.5)                                        | 105 (70.5)      | 149   | 47 (30.9)              | 105 (69.1)      | 152   |
|                                  | Total     | 926 (47.4)                                                                             | 1,026 (52.6)    | 1,952 | 1,553 (60.2)                                     | 1,026 (39.8)    | 2,579 | 1,791 (63.6)           | 1,026 (36.4)    | 2,817 |

Supplementary Table 5: Linked Hospital Episode Statistics (HES) Admitted Patient Care (APC) data for the 5 years prior to the date of the wave 9 (age 55) interview against self-rated general health at wave 9 (age 55) in the National Child Development Study (NCDS): females

|                                  |           | Linked HES APC data for the 5 years prior to the date of the wave 9 (age 55) interview |                 |       |                                                  |                 |       |                        |                 |       |
|----------------------------------|-----------|----------------------------------------------------------------------------------------|-----------------|-------|--------------------------------------------------|-----------------|-------|------------------------|-----------------|-------|
|                                  |           | Individuals with linked APC data                                                       |                 |       | Individuals with at least one linked HES dataset |                 |       | All linkage consenters |                 |       |
|                                  |           | No linked HES data                                                                     | Linked HES data | Total | No linked HES data                               | Linked HES data | Total | No linked HES data     | Linked HES data | Total |
| Age 55 self-rated general health | Excellent | 158 (60.1)                                                                             | 105 (39.9)      | 263   | 245 (70.0)                                       | 105 (30.0)      | 350   | 273 (72.2)             | 105 (27.8)      | 378   |
|                                  | Very good | 390 (54.3)                                                                             | 328 (45.7)      | 718   | 600 (64.7)                                       | 328 (35.3)      | 928   | 677 (67.4)             | 328 (32.6)      | 1,005 |
|                                  | Good      | 328 (45.2)                                                                             | 398 (54.8)      | 726   | 499 (55.6)                                       | 398 (44.4)      | 897   | 553 (58.2)             | 398 (41.8)      | 951   |
|                                  | Fair      | 120 (33.3)                                                                             | 240 (66.7)      | 360   | 156 (39.4)                                       | 240 (60.6)      | 396   | 167 (41.0)             | 240 (59.0)      | 407   |
|                                  | Poor      | 36 (20.1)                                                                              | 143 (79.9)      | 179   | 40 (21.9)                                        | 143 (78.1)      | 183   | 43 (23.1)              | 143 (76.9)      | 186   |
|                                  | Total     | 1,032 (46.0)                                                                           | 1,214 (54.0)    | 2,246 | 1,540 (55.9)                                     | 1,214 (44.1)    | 2,754 | 1,713 (58.5)           | 1,214 (41.5)    | 2,927 |

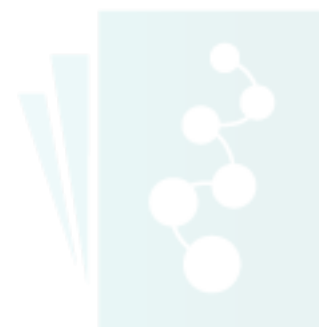

Supplementary Table 6: Linked National Child Development Study (NCDS)-Hospital Episode Statistics (HES) Admitted Patient Care (APC) and population (HES APC) finished admission episode (FAE) data by financial year

| Financial year | Linked NCDS-HES data |       |                                        |                                        |                                        |           | Population data |            |               |
|----------------|----------------------|-------|----------------------------------------|----------------------------------------|----------------------------------------|-----------|-----------------|------------|---------------|
|                | Age                  | FAEs  | Rate per 1000 <sup>A</sup><br>(95% CI) | Rate per 1000 <sup>B</sup><br>(95% CI) | Rate per 1000 <sup>C</sup><br>(95% CI) | Age group | FAEs            | Population | Rate per 1000 |
| 1997–1998      | 39                   | 665   | 137.2 (126.8, 146.9)                   | 108.7 (100.9, 116.5)                   | 100.9 (93.6, 108.1)                    | 35–39     |                 |            |               |
| 1998–1999      | 40                   | 734   | 151.5 (140.1, 161.6)                   | 120.0 (111.8, 128.1)                   | 111.3 (103.7, 118.9)                   | 40–44     |                 |            |               |
| 1999–2000      | 41                   | 739   | 152.5 (141.5, 162.6)                   | 120.8 (112.6, 128.9)                   | 112.1 (104.5, 119.7)                   | 40–44     |                 |            |               |
| 2000–2001      | 42                   | 731   | 150.8 (139.7, 160.9)                   | 119.5 (111.3, 127.6)                   | 110.9 (103.3, 118.5)                   | 40–44     |                 |            |               |
| 2001–2002      | 43                   | 796   | 164.3 (153.8, 174.7)                   | 130.1 (121.7, 138.5)                   | 120.7 (112.9, 128.6)                   | 40–44     |                 |            |               |
| 2002–2003      | 44                   | 861   | 177.7 (165.8, 188.4)                   | 140.7 (132.0, 149.4)                   | 130.6 (122.5, 138.7)                   | 40–44     |                 |            |               |
| 2003–2004      | 45                   | 841   | 173.5 (162.0, 184.2)                   | 137.4 (128.8, 146.1)                   | 127.6 (119.5, 135.6)                   | 45–49     |                 |            |               |
| 2004–2005      | 46                   | 891   | 183.9 (172.0, 194.8)                   | 145.6 (136.8, 154.4)                   | 135.1 (126.9, 143.4)                   | 45–49     | 556,945         | 3,286,033  | 169.5         |
| 2005–2006      | 47                   | 952   | 196.5 (185.0, 207.6)                   | 155.6 (146.5, 164.7)                   | 144.4 (135.9, 152.9)                   | 45–49     | 598,927         | 3,371,275  | 177.7         |
| 2006–2007      | 48                   | 1,130 | 233.2 (219.7, 245.1)                   | 184.7 (174.9, 194.4)                   | 171.4 (162.3, 180.5)                   | 45–49     | 630,320         | 3,467,878  | 181.8         |
| 2007–2008      | 49                   | 1,025 | 211.5 (198.8, 223.0)                   | 167.5 (158.2, 176.9)                   | 155.5 (146.7, 164.2)                   | 45–49     | 669,761         | 3,558,017  | 188.2         |
| 2008–2009      | 50                   | 1,321 | 272.6 (259.3, 285.1)                   | 215.9 (205.6, 226.2)                   | 200.4 (190.7, 210.0)                   | 50–54     | 728,803         | 3,173,349  | 229.7         |
| 2009–2010      | 51                   | 1,282 | 264.5 (251.9, 277.0)                   | 209.5 (199.3, 219.7)                   | 194.4 (184.9, 204.0)                   | 50–54     | 759,705         | 3,242,313  | 234.3         |
| 2010–2011      | 52                   | 1,320 | 272.4 (259.1, 284.9)                   | 215.7 (205.4, 226.0)                   | 200.2 (190.6, 209.9)                   | 50–54     | 797,253         | 3,326,036  | 239.7         |
| 2011–2012      | 53                   | 1,463 | 301.9 (288.2, 314.8)                   | 239.1 (228.4, 249.8)                   | 221.9 (211.9, 231.9)                   | 50–54     | 818,832         | 3,422,579  | 239.2         |
| 2012–2013      | 54                   | 1,582 | 326.5 (312.0, 339.7)                   | 258.5 (247.6, 269.5)                   | 240.0 (229.6, 250.3)                   | 50–54     | 845,832         | 3,523,521  | 240.1         |
| 2013–2014      | 55                   | 1,736 | 358.2 (343.4, 371.7)                   | 283.7 (272.4, 295.0)                   | 263.3 (252.7, 273.9)                   | 55–59     | 910,188         | 3,114,224  | 292.3         |
| 2014–2015      | 56                   | 1,900 | 392.1 (377.3, 405.8)                   | 310.5 (298.9, 322.1)                   | 288.2 (277.3, 299.1)                   | 55–59     | 962,339         | 3,186,581  | 302.0         |
| 2015–2016      | 57                   | 2,002 | 413.1 (398.1, 427.0)                   | 327.2 (315.4, 338.9)                   | 303.7 (292.6, 314.8)                   | 55–59     | 1,037,374       | 3,278,322  | 316.4         |

<sup>A</sup>Rate in individuals with any linked HES APC record ever ( $n = 4,846$ ).

<sup>B</sup>Rate in individuals with any linked HES record ever ( $n = 6,119$ ).

<sup>C</sup>Rate in HES linkage consenters ( $n = 6,593$ ).

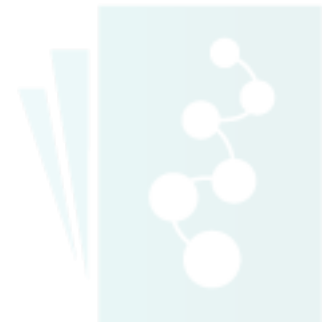

Supplement: ijpds-09-2137-s001.pdf [file ijpds-09-2137-s001.pdf]
